# Supplementary material for: Erlotinib plus bevacizumab versus erlotinib alone in patients with EGFR -positive advanced non-small-cell lung cancer: a systematic review and meta-analysis of randomised controlled trials
Source: HighWire-hosted journal article supplement (doi:10.1136/bmjopen-2022-062036), 2022-08-01
Supplement: bmjopen-2022-062036supp002_data_supplement.pdf [file bmjopen-2022-062036supp002_data_supplement.pdf]

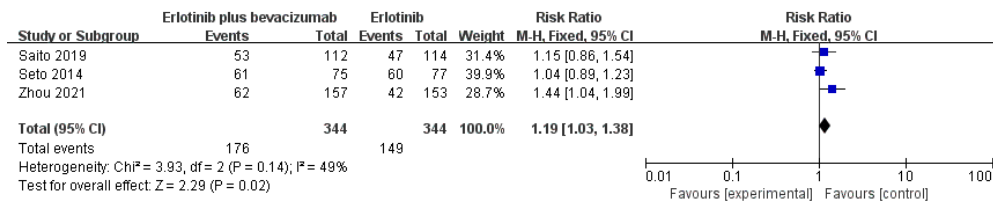

FigureS1 Forest plot of AEs of diarrhea

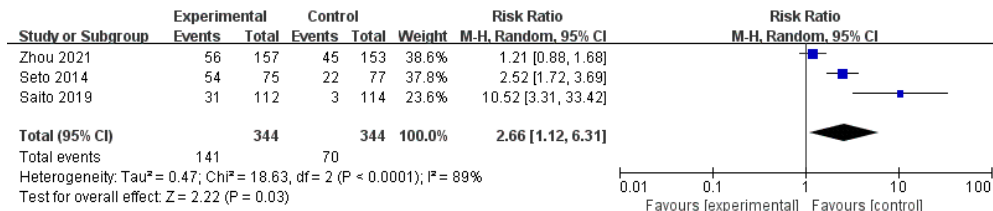

FigureS2 Forest plot of AEs of haemorrhagic event

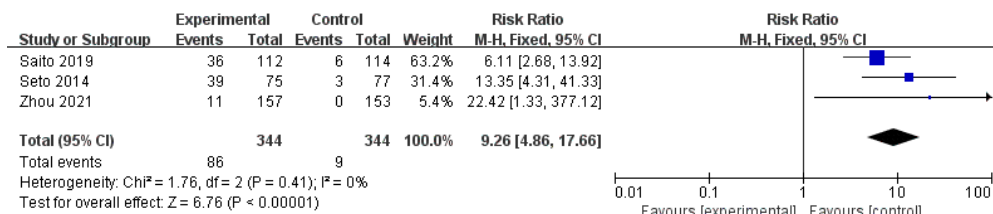

FigureS3 Forest plot of AEs of proteinuria

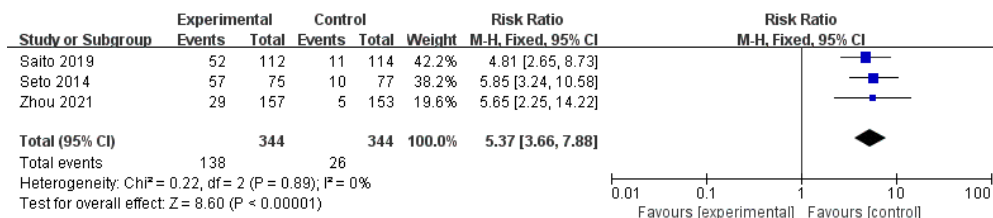

FigureS4 Forest plot of AEs of hypertension

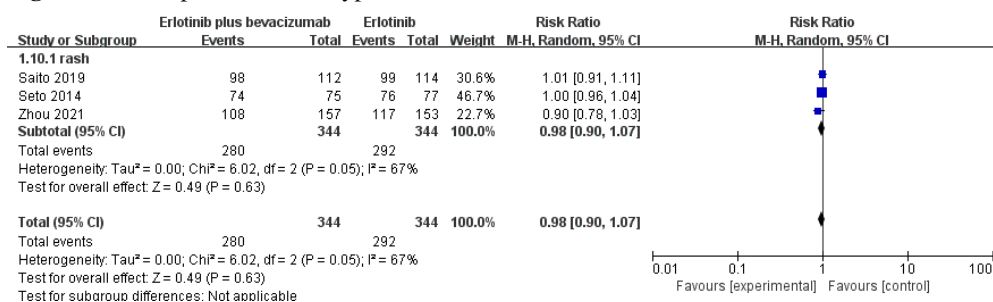

FigureS5 Forest plot of AEs of rash

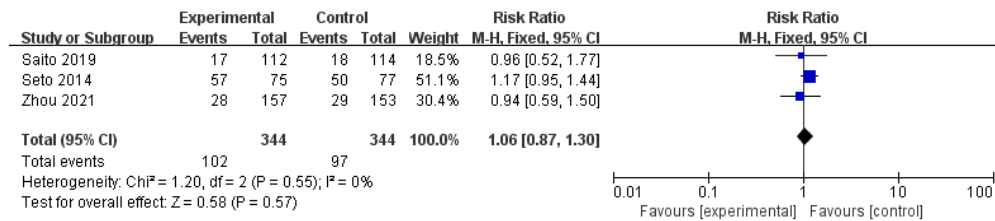

FigureS6 Forest plot of AEs of paronychia

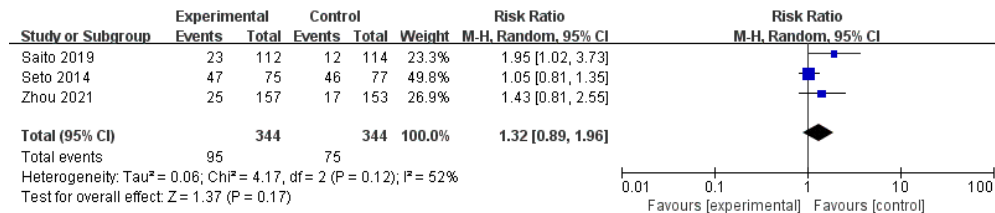

FigureS7 Forest plot of AEs of stomatitis

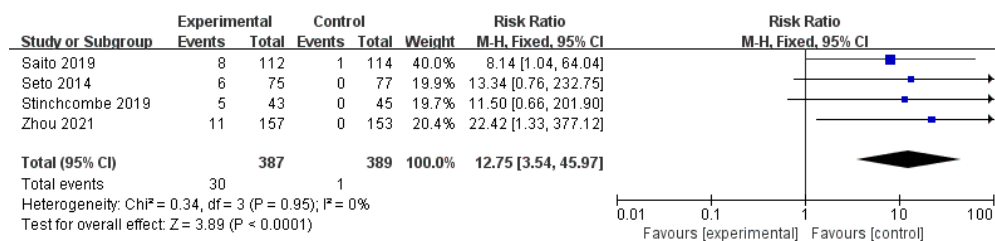

FigureS8 Forest plot of severe AEs of proteinuria

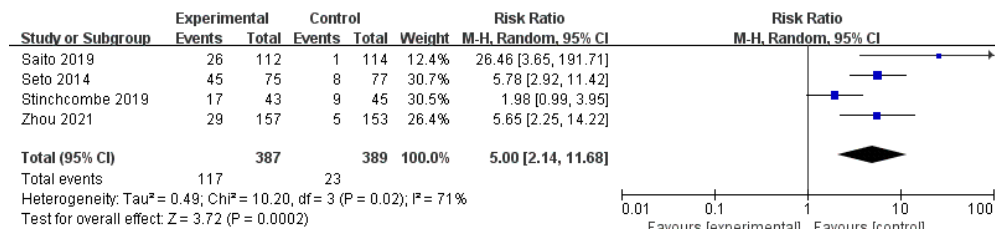

FigureS9 Forest plot of severe AEs of hypertension

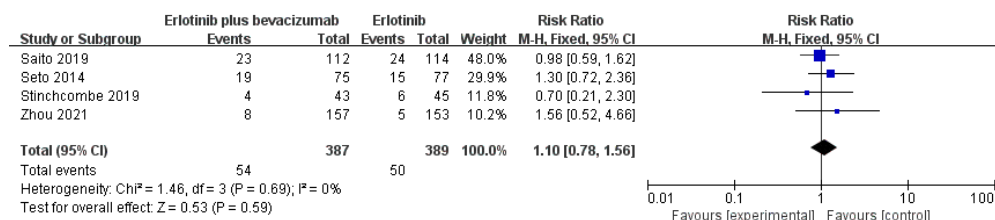

FigureS10 Forest plot of severe AEs of rash

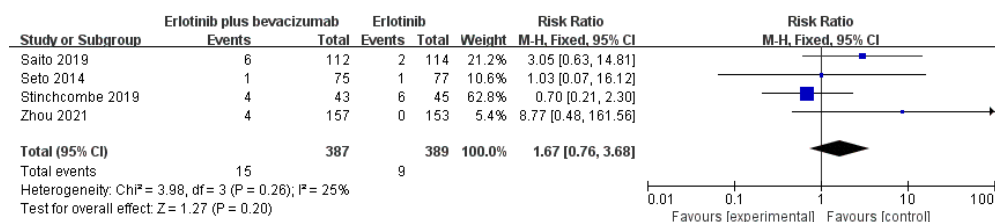

FigureS11 Forest plot of severe AEs of diarrhea

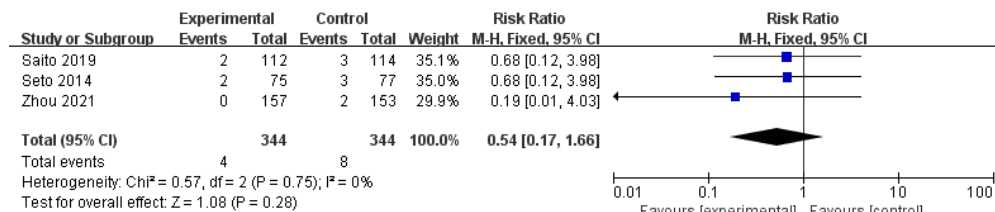

FigureS12 Forest plot of severe AEs of paronychia

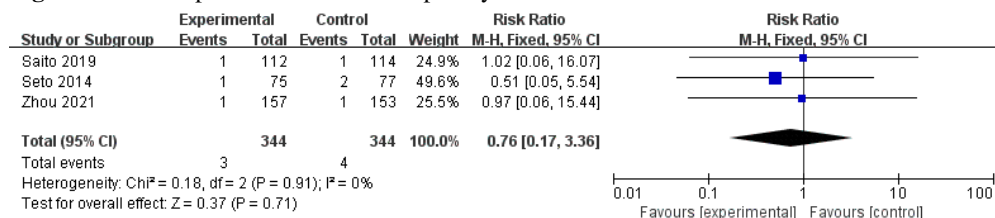

FigureS13 Forest plot of severe AEs of stomatitis

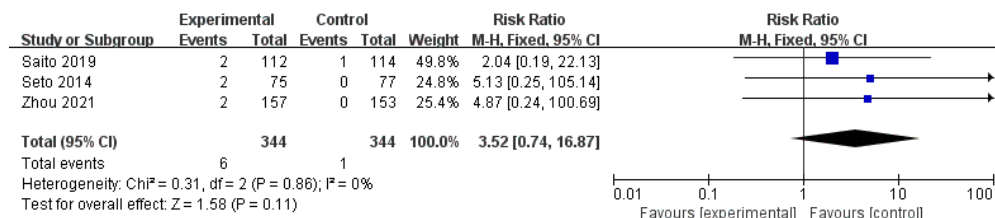

FigureS14 Forest plot of severe AEs of haemorrhagic event
